# Supplementary material for: “Evaluating the Benefits and Limits of Multiple Displacement Amplification with Whole-Genome Oxford Nanopore Sequencing”
Source: PubMed Central journal article supplement — bioRxiv. 2024 Feb 12:2024.02.09.579537. Preprint. [Version 1] doi: 10.1101/2024.02.09.579537 (PMC10888933; doi:10.1101/2024.02.09.579537), 2024-02-12
Supplement: NIHPP2024.02.09.579537V1-supplement-1.pdf [file NIHPP2024.02.09.579537V1-supplement-1.pdf]

540 SUPPLEMENTAL FIGURES

541

542

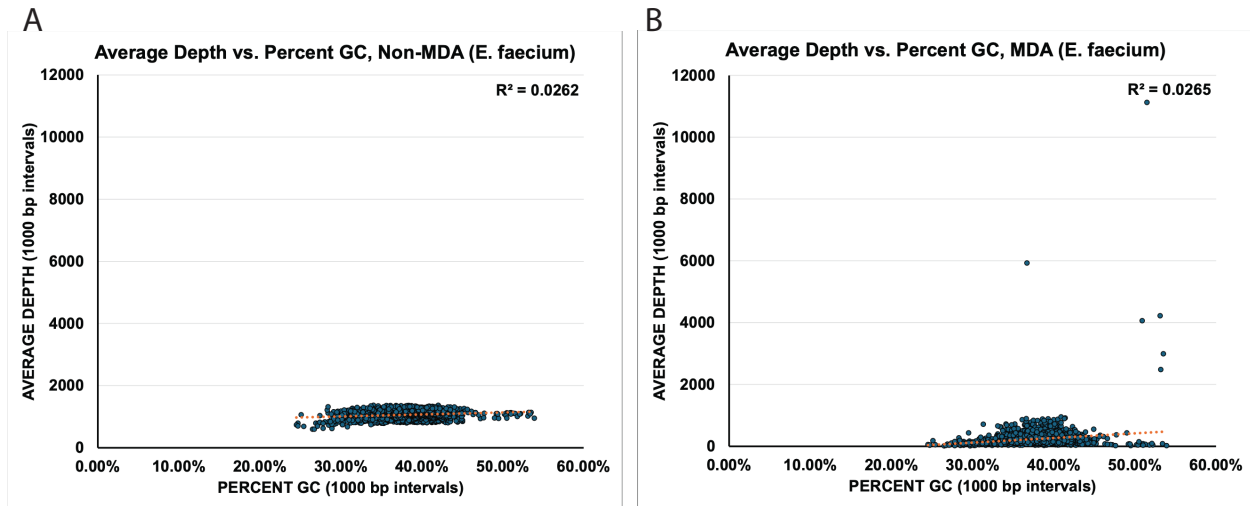

543

544

545 **Figure S1. Square regression correlation coefficient between average depth and average %GC**

546 **across 1000 base pair sliding window regions of the genomic assembly shows low correlation**

547 **to %GC. A correlation analysis of (A) non-amplified and (B) amplified assemblies of *E. faecium*.**

548

549

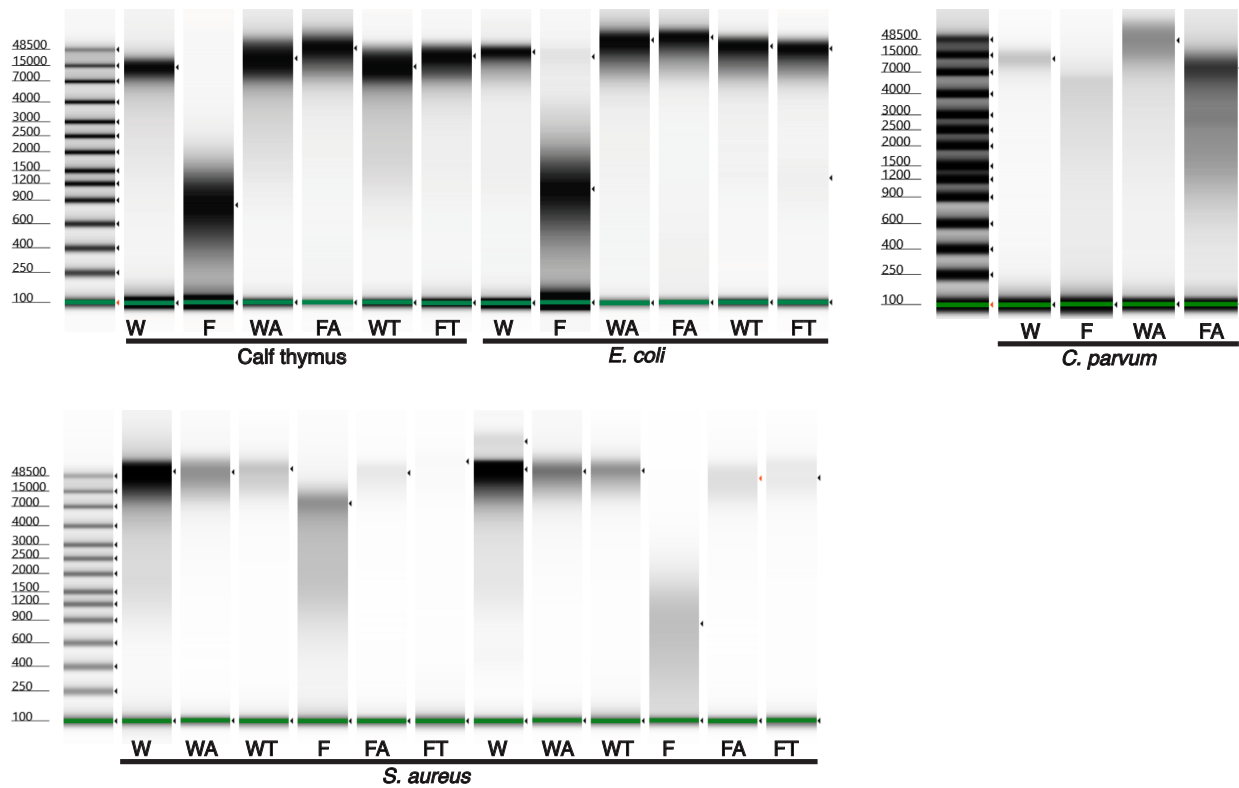

550

551

552 **Figure S2.** Uncropped DNA Fragment and read Size Range pre- and post- Multiple Displacement  
553 Amplification using Size-Controlled Fragmented DNA. Uncropped TapeStation results for  
554 different organism sets; (W = whole intact DNA; F = Fragmented DNA; WA and FA = after  
555 amplification; and WT and FT = after T7 debranching.

556

557

558 **SUPPLEMENTAL TABLES**

559

560 **Table S1** - Whole genome assembly statistics for the data generated using MDA.

561

| Assembly                     | Condition               | Total length (nt) | # of contigs | Largest contig (nt) | GC%   | N50       | L50 | # N's per 100 Kbp |
|------------------------------|-------------------------|-------------------|--------------|---------------------|-------|-----------|-----|-------------------|
| <b><i>C. meleagridis</i></b> | WGA (5 ng)              | 9,171,013         | 13           | 1,363,785           | 30.92 | 1,103,979 | 4   | 0                 |
| <b><i>E. coli</i></b>        | WGA-Intact DNA          | 6,702,699         | 252          | 479,759             | 50.49 | 157,769   | 12  | 0                 |
|                              | WGA-Fragmented DNA      | 157,593           | 12           | 25,757              | 49.23 | 20,338    | 4   | 0                 |
| <b><i>E. faecium</i></b>     | 400ng (no MDA)          | 2,775,595         | 2            | 2,583,377           | 38.27 | 2,583,377 | 1   | 0                 |
|                              | 1 ng                    | 3,603,364         | 216          | 257,348             | 38.3  | 64,352    | 14  | 0                 |
|                              | 1E-1ng                  | 4,287,796         | 570          | 83,451              | 38.66 | 27,070    | 49  | 0                 |
|                              | 1E-2 ng                 | 4,146,213         | 1,066        | 65,055              | 38.94 | 13,948    | 95  | 0                 |
|                              | 1E-3 ng                 | 1,174             | 2            | 670                 | 53.15 | 670       | 1   | 0                 |
|                              | 1E-4 ng                 | 78,463            | 53           | 15,260              | 53.83 | 2,204     | 7   | 0                 |
|                              | 1E-5 ng                 | 54,253            | 32           | 6,962               | 56.49 | 3,816     | 6   | 0                 |
| <b><i>S. aureus</i></b>      | Intact DNA              | 2,766,204         | 3            | 2,717,982           | 32.86 | 2,717,982 | 1   | 0                 |
|                              | Fragmented DNA          | 854,501           | 198          | 33,734              | 33.62 | 4,926     | 36  | 0                 |
|                              | Intact DNA post-WGA     | 2,763,611         | 4            | 2,717,354           | 32.86 | 2,717,354 | 1   | 0                 |
|                              | Fragmented DNA post-WGA | 2,842,696         | 20           | 1,890,364           | 32.84 | 1,890,364 | 1   | 0                 |

562

563 **Table S2** - Sequencing Statistics for *E. faecium*\* WGS results at 2.5 ng and 0.25 ng starting DNA  
564 input.  
565

| <b>Starting total DNA</b>        | <b>2.5 ng</b> | <b>0.25 ng</b> |
|----------------------------------|---------------|----------------|
| <b>Depth</b>                     | 73×           | 35×            |
| <b>Total length (bp)</b>         | 2,778,112     | 2,918,507      |
| <b>Number of contigs</b>         | 3             | 35             |
| <b>GC%</b>                       | 38.2          | 38.28          |
| <b>N50</b>                       | 2,589,111     | 233,792        |
| <b>L50</b>                       | 1             | 4              |
| <b>Number of N's per 100 Kbp</b> | 0             | 0              |

566 \*the expected genome size for *E. faecium* species varies between 2.6 and 3.2 Mb  
567

568 **Table S3** - Read length distribution among the DNA dilutions for *E. faecium*, based on starting  
569 DNA concentration.  
570

| <b>Starting DNA Amount (ng)</b> | <b>Mean Read Length (bp)</b> | <b>Median Read Length (bp)</b> |
|---------------------------------|------------------------------|--------------------------------|
| Control 400                     | 6,134                        | 3,819                          |
| 2.5                             | 2,533                        | 1,308                          |
| 2.5E-01                         | 2,305                        | 1,002                          |
| 2.5E-02                         | 2,390                        | 1,147                          |
| 2.5E-03                         | 3,121                        | 1,086                          |
| 2.5E-04                         | 2,555                        | 1,185                          |
| 2.5E-05                         | 2,641                        | 957                            |

571  
572

573 **Table S4.** Comparison between *S. aureus* ATCC-29213 genome sequences assembled before  
574 and after CADECT with assembly length, number of contigs, number of reads, and mean read  
575 length.

576

|                                    | <b>Fragmented DNA with<br/>MDA <u>before</u> CADECT</b> | <b>Fragmented DNA with<br/>MDA <u>after</u> CADECT</b> |
|------------------------------------|---------------------------------------------------------|--------------------------------------------------------|
| <b>Assembly<br/>length (bp)</b>    | 2,842,696                                               | 2,752,482                                              |
| <b>Number of<br/>contigs</b>       | 20                                                      | 3                                                      |
| <b>Number of<br/>reads</b>         | 324,197                                                 | 292,789                                                |
| <b>Mean read<br/>length (bp)</b>   | 2,163                                                   | 1,534                                                  |
| <b>Median read<br/>length (bp)</b> | 1,352                                                   | 1,202                                                  |

577

578 **Table S5.** Comparison between *S. aureus* results from CADECT using low DNA input samples.  
579

| DNA input Condition                                 | Intact DNA  |             | Fragmented DNA |             |      |
|-----------------------------------------------------|-------------|-------------|----------------|-------------|------|
|                                                     | No          | yes         | no             | yes         |      |
| <b>MDA</b>                                          |             |             |                |             |      |
| <b>Sequencing coverage input</b>                    |             | 46.8        | 92.3           | 21.7****    | 77.4 |
| <b>Total number of sequenced base pairs</b>         | 131,012,134 | 258,412,289 | 60,893,145     | 216,785,548 |      |
| <b>Number of shorter reads detected*</b>            | 6,397       | 49,746      | 109,830        | 54,268      |      |
| <b>Number of non-concatemer reads detected</b>      | 12,556      | 44,440      | 2,548          | 35,986      |      |
| <b>Number of putative concatemer reads detected</b> | 1,047       | 5,814       | 26**           | 9,746**     |      |
| <b>Total number of Reads analyzed:</b>              | 20,000      | 100,000     | 112,404        | 100,000     |      |
| <b>read loss (%)</b>                                | 37          | 56          | 98             | 64          |      |
| <b>Total number of non-Concatemer base pairs</b>    | 103,146,375 | 153,374,280 | 5,304,400      | 96,993,865  |      |
| <b>Coverage loss (x)</b>                            | 10.0        | 37.5        | 19.9           | 42.8        |      |

580 \*Shorter reads were reads detected below the default setting of 500 nt window size

581 \*\*Due to size selection putative concatemers were classified as short reads

582 \*\*\*Loss if using just the reads characterized as non-concatemeric

583 \*\*\*\*Without the amplification ONT had a bad throughput for the fragmented samples at low  
584 input values to generate longer reads, resulting in a low sequencing coverage.
